# Supplementary material for: Influence of Gut Microbiota on Immune Responses and Protection in Volunteers Receiving the Live Attenuated Oral ETEC Vaccine ACE257 followed by Virulent ETEC H10407 Challenge
Source: Research Square preprint supplement (doi:10.21203/rs.3.rs-9284363/v1), 2026-05-04
Supplement: Supplementary file 1 [file 9320a681f48d618f0f592ce0.docx]

**SUPPLEMENTARY FILE 1**

**Table S1. ALS LTB IgA fold change per log2 increase α-diversity (V0 to V21)**

| **Indices** | **Average Fold Change (95%CI)** | **p-value** |
| --- | --- | --- |
| Shannon | -1.97(-4.00,0.05) | 0.064 |
| Inverse Simpson | -0.72(-1.37, -0.07) | 0.037 |
| Pielou’s Evenness | -0.80(-3.66,2.07) | 0.588 |

**Table S2 ALS CFA/I IgA Fold Change per log2 increase α-diversity (V0 to V21)**

| **Indices** | **Average Fold Change (95%CI)** | **p-value** |
| --- | --- | --- |
| Shannon | -2.0(-4.1,-0.03) | 0.055 |
| Inverse Simpson | -0.8(-1.4,0.1) | 0.023 |
| Pilou’s Evenness | -1.1(-3.9,1.8) | 0.462 |

**Table S3 Serum CFA/I IgA Fold Change (V0 to V21) per log2 increase in α-diversity**

| **Indices** | **Average Fold Change (95%CI)** | **p-value** |
| --- | --- | --- |
| Shannon | -2.3(-4.2,-0.4) | 0.023 |
| inverse Simpson | -0.8(-1.4,-0.2) | 0.010 |
| Pielou’s Evenness | -2.9(-5.5,-0.3) | 0.040 |

**Table S4** Relaxed lasso predictions and taxon selection (ALS LTB IgA; Day 0 to 21 & 0 to 28)

|  | V0-V21 | | | V0-V28 | | |  |
| --- | --- | --- | --- | --- | --- | --- | --- |
| Taxa | **ΔFold Change(95%CI)** | **p-value** | **adjusted p-value** | **ΔFold Change(95%CI)** | **p-value** | **adjusted p-value** | **Taxon Units** |
| Erysipelatoclostridium  (0.1% increase) | 0.10 (0.01,0.20) | 0.032 | 0.161 |  |  |  | 0.1% increase |
| Lachnospiraceae_FCS020_group | -0.11 (-0.21,0.00) | 0.050 | 0.163 |  |  |  | 0.1% increase |
| Anaerostipes | -1.19 (-2.33,-0.05) | 0.041 | 0.163 |  |  |  | Present vs Absent |
| Haemophilus | -0.46 (-1.05,0.13) | 0.124 | 0.249 |  |  |  | Present vs Absent |
| Papillibacter | 1.01 (0.33,1.69) | 0.005 | 0.028 |  |  |  | Present vs Absent |
| Phascolarctobacterium | -0.03 (-0.08,0.02) | 0.202 | 0.249 |  |  |  | 0.1% increase |
| Eubacterium_nodatum_group |  |  |  | 1.37 (0.59,2.15) | 0.001 | 0.002 | Present vs Absent |
| Slackia |  |  |  | -0.71 (-1.11,-0.31) | 0.001 | 0.002 | 0.1% increase |

**Table S5** Relaxed lasso predictions and taxon selection (ALS CFA/I IgA; Day 0 to 28)

| Taxa | ΔFold Change(95%CI) | p-value | adjusted p-value | Taxon Units |
| --- | --- | --- | --- | --- |
| Eubacterium_ventriosum_group | 0.04 (-0.02,0.10) | 0.159 | 1.000 | 0.1% increase |
| Streptococcus | -0.00 (-0.01,0.01) | 0.998 | 1.000 | 0.1% increase |
| Erysipelotrichaceae_UCG_003 | 0.07 (0.05,0.08) | <0.001 | <0.001 | 0.1% increase |
| Dielma | 0.26 (-0.16,0.68) | 0.205 | 1.000 | Present vs Absent |
| Merdibacter | 0.47 (0.04,0.90) | 0.033 | 0.722 | Present vs Absent |
| Akkermansia | 0.29 (-0.02,0.59) | 0.065 | 1.000 | Present vs Absent |
| UCG_009 | 0.05 (-0.23,0.33) | 0.699 | 1.000 | Present vs Absent |
| Paraprevotella | 0.03 (-0.25,0.31) | 0.833 | 1.000 | Present vs Absent |
| Candidatus_Soleaferrea | 0.19 (-0.08,0.45) | 0.156 | 1.000 | Present vs Absent |
| Lachnospiraceae_ND3007_group | -0.32 (-1.31,0.67) | 0.501 | 1.000 | Present vs Absent |
| Eubacterium_nodatum_group | -0.48 (-0.96,-0.01) | 0.045 | 0.829 | Present vs Absent |
| Family_XIII_UCG_001 | 0.09 (-0.30,0.49) | 0.629 | 1.000 | Present vs Absent |
| Terrisporobacter | 0.38 (0.03,0.74) | 0.035 | 0.738 | Present vs Absent |
| Actinomyces | -0.47 (-0.92,-0.02) | 0.043 | 0.829 | Present vs Absent |
| Lachnospiraceae_UCG_001 | 0.20 (-0.10,0.50) | 0.171 | 1.000 | Present vs Absent |
| Ruminococcus_gauvreauii_group | 0.46 (0.05,0.88) | 0.031 | 0.722 | Present vs Absent |
| Lachnospiraceae_UCG_002 | 0.43 (0.02,0.85) | 0.041 | 0.829 | Present vs Absent |
| Bilophila | -0.11 (-0.46,0.24) | 0.508 | 1.000 | Present vs Absent |
| Anaerofustis | 0.22 (-0.17,0.61) | 0.243 | 1.000 | Present vs Absent |
| Oscillospira | 0.14 (-0.31,0.58) | 0.522 | 1.000 | Present vs Absent |
| Olsenella | -0.10 (-0.48,0.28) | 0.584 | 1.000 | Present vs Absent |
| Collinsella | -0.39 (-1.36,0.58) | 0.406 | 1.000 | Present vs Absent |
| Libanicoccus | -0.20 (-0.57,0.16) | 0.249 | 1.000 | Present vs Absent |
| Parasutterella | -0.20 (-0.50,0.11) | 0.185 | 1.000 | Present vs Absent |
| Sutterella | -0.19 (-0.32,-0.06) | 0.008 | 0.186 | 0.1% increase |

**Table S6** Relaxed lasso predictions and taxon selection (Serum CFA/I IgA; Day 0 to 21 & 0 to 31)

|  | V0-V21 | | | V0-V31 | | |  |
| --- | --- | --- | --- | --- | --- | --- | --- |
| Taxa | **ΔFold Change(95%CI)** | **p-value** | **adjusted p-value** | **ΔFold Change(95%CI)** | **p-value** | **adjusted p-value** | **Taxon Units** |
| Faecalitalea | 0.88 (0.14,1.62) | 0.021 | 0.126 |  |  |  | Present vs Absent |
| Merdibacter | 0.45 (-0.24,1.13) | 0.191 | 0.764 |  |  |  | Present vs Absent |
| Akkermansia | 0.31 (-0.28,0.90) | 0.289 | 0.868 | 0.91 (0.41,1.42) | 0.001 | 0.016 | Present vs Absent |
| Hungatella | 0.88 (0.25,1.51) | 0.008 | 0.056 | 0.65 (0.11,1.18) | 0.020 | 0.264 | Present vs Absent |
| GCA_900066575 | -0.01 (-0.61,0.60) | 0.985 | 1.000 |  |  |  | Present vs Absent |
| UCG_002 | 0.05 (-0.81,0.92) | 0.899 | 1.000 |  |  |  | Present vs Absent |
| Libanicoccus | -0.61 (-1.24,0.02) | 0.059 | 0.294 | -0.16 (-0.77,0.45) | 0.595 | 1.000 | Present vs Absent |
| DTU089 | -0.87 (-1.36,-0.38) | 0.001 | 0.009 | -0.32 (-0.79,0.16) | 0.180 | 1.000 | Present vs Absent |
| Catenibacterium |  |  |  | 0.15 (-0.43,0.72) | 0.602 | 1.000 | Present vs Absent |
| Prevotella_7 |  |  |  | 0.10 (-0.48,0.67) | 0.733 | 1.000 | Present vs Absent |
| Eubacterium_eligens_group |  |  |  | 0.35 (-0.19,0.89) | 0.194 | 1.000 | Present vs Absent |
| Lachnospira |  |  |  | 0.01 (-0.04,0.05) | 0.802 | 1.000 | 1% increase |
| Intestinibacter |  |  |  | 0.09 (-0.00,0.18) | 0.056 | 0.616 | 1% increase |
| FD2005 |  |  |  | -0.25 (-0.80,0.29) | 0.345 | 1.000 | Present vs Absent |
| Sellimonas |  |  |  | 0.24 (-0.29,0.76) | 0.364 | 1.000 | Present vs Absent |
| Haemophilus |  |  |  | 0.01 (-0.67,0.70) | 0.966 | 1.000 | Present vs Absent |
| Christensenella |  |  |  | -0.63 (-1.12,-0.15) | 0.013 | 0.184 | Present vs Absent |
| Peptococcus |  |  |  | -0.63 (-1.19,-0.08) | 0.027 | 0.326 | Present vs Absent |
| Anaerotruncus |  |  |  | -0.06 (-0.61,0.48) | 0.814 | 1.000 | Present vs Absent |

**Table S7** Relaxed lasso predictions and taxon selection (Serum CFA/I IgG; Day 0 to 21 & 0 to 31)

|  | V0-V21 | | | V0-V31 | | |  |
| --- | --- | --- | --- | --- | --- | --- | --- |
| Taxa | **ΔFold Change(95%CI)** | **p-value** | **adjusted p-value** | **ΔFold Change(95%CI)** | **p-value** | **adjusted p-value** | **Taxon Units** |
| Sutturella | -0.33 (-0.51,-0.14) | 0.001 | 0.001 | -0.27 (-0.45,-0.09) | 0.005 | 0.010 | 0.1% increase |
| Raoultibacter |  |  |  | -1.19 (-2.09,-0.29) | 0.011 | 0.011 | Present vs Absent |

**Table S8** Relaxed lasso predictions and taxon selection for vaccine outcome, shedding

|  |  | Diarrhea | | | | Max Shedding | | |  |
| --- | --- | --- | --- | --- | --- | --- | --- | --- | --- |
| Taxa | **OR (95%CI)** | | **Δlog10** | **p-value** | **adjusted p-value** | **Δlog10** | **p-value** | **adjusted p-value** | **Taxon Units** |
| Bacteroides | 0.98 0.94,1.01) | | −0.009 (−0.027, 0.004) | 0.219 | 0.657 |  |  |  | 0.1% increase |
| Eubacterium_eligens_group | 0.13 (0.01,1.27) | | −0.89 (−2.00, 0.10) | 0.079 | 0.317 |  |  |  | Present vs Absent |
| Veillonella | 0.30 (0.03,3.26) | | −0.52 (−1.52, 0.51) | 0.325 | 0.657 |  |  |  | Present vs Absent |
| Dialister | 0.30 (0.03,3.06) | | −0.52 (−1.52, 0.49) | 0.311 | 0.657 |  |  |  | Present vs Absent |
| Prevotella_7 |  | |  |  |  | -1.07 (-1.85,-0.30) | 0.013 | 0.026 | Present vs Absent |
| Defluviitaleaceae_UCG_011 |  | |  |  |  | -0.90 (-1.62,-0.18) | 0.020 | 0.026 | Present vs Absent |
| Allisonella |  | |  |  |  | 1.27 (0.62,1.93) | 0.002 | 0.006 | Present vs Absent |
