# Supplementary material for: Influence of Gut Microbiota on Immune Responses and Protection in Volunteers Receiving the Live Attenuated Oral ETEC Vaccine ACE257 followed by Virulent ETEC H10407 Challenge
Source: Research Square preprint supplement (doi:10.21203/rs.3.rs-9284363/v1), 2026-05-04
Supplement: Supplementary file 2 [file ceacf15565d019f60d0ebc74.pdf]

## Protective Taxa

| Outcome                  | MetaCyc pathway types overrepresented by pathways more frequently encoded in the genomes of protective taxa, stratified by outcome? |                                                                                                                                                                                                  |                                                                                                                                                                                                  |                             |                                      |                                                                                                                                                             |                                                                                                   | MetaCyc pathway types overrepresented by pathways less frequently encoded in the genomes of protective taxa, stratified by outcome?                                                              |                                                                                                                                                                                                  |                             |                                      |                                                            |                                                                              |
|--------------------------|-------------------------------------------------------------------------------------------------------------------------------------|--------------------------------------------------------------------------------------------------------------------------------------------------------------------------------------------------|--------------------------------------------------------------------------------------------------------------------------------------------------------------------------------------------------|-----------------------------|--------------------------------------|-------------------------------------------------------------------------------------------------------------------------------------------------------------|---------------------------------------------------------------------------------------------------|--------------------------------------------------------------------------------------------------------------------------------------------------------------------------------------------------|--------------------------------------------------------------------------------------------------------------------------------------------------------------------------------------------------|-----------------------------|--------------------------------------|------------------------------------------------------------|------------------------------------------------------------------------------|
|                          | Pathway Type                                                                                                                        | number of pathways that were significantly MORE prevalent in protective taxa grouped in this MetaCyc Pathway Type / number of pathways that were significantly MORE prevalent in Protective taxa | number of pathways that were not differentially prevalent in Protective taxa grouped in this MetaCyc Pathway Type / number of pathways that were not differentially prevalent in Protective taxa | Over-representation p-value | Adjusted Over-representation p-value | Pathways Over-represented within this MetaCyc Pathway Type                                                                                                  | Protective Taxa Predicted to Carry the Over-represented Pathways                                  | number of pathways that were significantly LESS prevalent in protective taxa grouped in this MetaCyc Pathway Type / number of pathways that were significantly LESS prevalent in Protective taxa | number of pathways that were not differentially prevalent in Protective taxa grouped in this MetaCyc Pathway Type / number of pathways that were not differentially prevalent in Protective taxa | Over-representation p-value | Adjusted Over-representation p-value | Pathways Over-represented within this MetaCyc Pathway Type | Protective Taxa Predicted to Lack the Over-represented Pathways              |
| Diarrhea                 | Glycan Pathways                                                                                                                     | 3/11 (27.3%)                                                                                                                                                                                     | 7/320 (2.2%)                                                                                                                                                                                     | 0.003                       | 0.168                                | lipid IVA biosynthesis (E. coli); Kdo transfer to lipid IVA (four Kdo residues); beta-(1,4)-mannan degradation                                              | Bacteroides; Dialister; Veillonella                                                               | 0/1 (0.0%)                                                                                                                                                                                       | 10/330 (3.0%)                                                                                                                                                                                    | 1.000                       | 1.000                                |                                                            |                                                                              |
| Diarrhea                 | Polymeric Compound Degradation                                                                                                      | 2/11 (18.2%)                                                                                                                                                                                     | 2/320 (0.6%)                                                                                                                                                                                     | 0.006                       | 0.169                                | chondroitin sulfate degradation I (bacterial); beta-(1,4)-mannan degradation                                                                                | Bacteroides                                                                                       | 0/1 (0.0%)                                                                                                                                                                                       | 4/330 (1.2%)                                                                                                                                                                                     | 1.000                       | 1.000                                |                                                            |                                                                              |
| Serum CFAI IgA V0 to V21 | C1 Compound Utilization and Assimilation                                                                                            | 0/0 (NaN%)                                                                                                                                                                                       | 6/331 (1.8%)                                                                                                                                                                                     | 1.000                       | 1.000                                |                                                                                                                                                             |                                                                                                   | 1/2 (50.0%)                                                                                                                                                                                      | 5/329 (1.5%)                                                                                                                                                                                     | 0.036                       | 1.000                                | Calvin-Benson-Bassham cycle                                | Akkermansia; Faecalitalea; Merdibacter; Oscillospiraceae_UCG-002             |
| Serum CFAI IgA V0 to V21 | Other Biosynthesis                                                                                                                  | 0/0 (NaN%)                                                                                                                                                                                       | 6/331 (1.8%)                                                                                                                                                                                     | 1.000                       | 1.000                                |                                                                                                                                                             |                                                                                                   | 1/2 (50.0%)                                                                                                                                                                                      | 5/329 (1.5%)                                                                                                                                                                                     | 0.036                       | 1.000                                | 6-hydroxymethyl-dihydropterin diphosphate biosynthesis I   | Akkermansia; Faecalitalea; Hungatella; Merdibacter; Oscillospiraceae_UCG-002 |
| Serum CFAI IgA V0 to V31 | Amino Acid Biosynthesis; Superpathways                                                                                              | 3/4 (75.0%)                                                                                                                                                                                      | 13/327 (4.0%)                                                                                                                                                                                    | <0.001                      | 0.021                                | L-methionine biosynthesis III; superpathway of L-methionine biosynthesis (by sulfhydrylation); superpathway of L-methionine biosynthesis (transsulfuration) | Akkermansia; Catenibacterium; Haemophilus; Hungatella; Lachnospira; Lachnospiraceae_eligens_group | 0/2 (0.0%)                                                                                                                                                                                       | 16/329 (4.9%)                                                                                                                                                                                    | 1.000                       | 1.000                                |                                                            |                                                                              |
| Serum CFAI IgA V0 to V31 | Amino Acid Biosynthesis                                                                                                             | 3/4 (75.0%)                                                                                                                                                                                      | 29/327 (8.9%)                                                                                                                                                                                    | 0.003                       | 0.090                                | L-methionine biosynthesis III; superpathway of L-methionine biosynthesis (by sulfhydrylation); superpathway                                                 | Akkermansia; Catenibacterium; Haemophilus; Hungatella; Lachnospira; Lachnospiraceae_eligens_group | 0/2 (0.0%)                                                                                                                                                                                       | 32/329 (9.7%)                                                                                                                                                                                    | 1.000                       | 1.000                                |                                                            |                                                                              |

|                          |                                          |            |               |       |       |                                                 |  |              |               |       |       |                                                                                             |                                                                                                                                              |
|--------------------------|------------------------------------------|------------|---------------|-------|-------|-------------------------------------------------|--|--------------|---------------|-------|-------|---------------------------------------------------------------------------------------------|----------------------------------------------------------------------------------------------------------------------------------------------|
|                          |                                          |            |               |       |       | of L-methionine biosynthesis (transsulfuration) |  |              |               |       |       |                                                                                             |                                                                                                                                              |
| Serum CFAI IgA V0 to V31 | Carbohydrate Biosynthesis                | 0/4 (0.0%) | 18/327 (5.5%) | 1.000 | 1.000 |                                                 |  | 2/2 (100.0%) | 16/329 (4.9%) | 0.003 | 0.162 | O-antigen building blocks biosynthesis (E. coli); UDP-N-acetyl-D-glucosamine biosynthesis I | Akkermansia; Catenibacterium; Haemophilus; Hungatella; Intestinibacter; Lachnospira; Lachnospiraceae_eligens_group; Prevotella_7; Sellimonas |
| Serum CFAI IgA V0 to V31 | Carbohydrate Biosynthesis; Superpathways | 0/4 (0.0%) | 5/327 (1.5%)  | 1.000 | 1.000 |                                                 |  | 1/2 (50.0%)  | 4/329 (1.2%)  | 0.030 | 0.871 | O-antigen building blocks biosynthesis (E. coli)                                            | Akkermansia; Catenibacterium; Haemophilus; Hungatella; Intestinibacter; Lachnospira; Lachnospiraceae_eligens_group; Prevotella_7; Sellimonas |

### Harmful Taxa

| Outcome                  | MetaCyc pathway types overrepresented by pathways more frequently encoded in the genomes of harmful taxa, stratified by outcome? |                                                                                                                                                                                                |                                                                                                                                                                                            |                             |                                      |                                                              |                                                               | MetaCyc pathway types overrepresented by pathways less frequently encoded in the genomes of harmful taxa, stratified by outcome?                                                               |                                                                                                                                                                                            |                             |                                      |                                                            |                                                              |  |
|--------------------------|----------------------------------------------------------------------------------------------------------------------------------|------------------------------------------------------------------------------------------------------------------------------------------------------------------------------------------------|--------------------------------------------------------------------------------------------------------------------------------------------------------------------------------------------|-----------------------------|--------------------------------------|--------------------------------------------------------------|---------------------------------------------------------------|------------------------------------------------------------------------------------------------------------------------------------------------------------------------------------------------|--------------------------------------------------------------------------------------------------------------------------------------------------------------------------------------------|-----------------------------|--------------------------------------|------------------------------------------------------------|--------------------------------------------------------------|--|
|                          | Pathway Type                                                                                                                     | number of pathways that were significantly MORE prevalent in Harmful taxa grouped in this MetaCyc Pathway Type / number of pathways that were not significantly MORE prevalent in Harmful taxa | number of pathways that were not differentially prevalent in Harmful taxa grouped in this MetaCyc Pathway Type / number of pathways that were not differentially prevalent in Harmful taxa | Over-representation p-value | Adjusted Over-representation p-value | Pathways Over-represented within this MetaCyc Pathway Type   | Harmful Taxa Predicted to Carry the Over-represented Pathways | number of pathways that were significantly LESS prevalent in Harmful taxa grouped in this MetaCyc Pathway Type / number of pathways that were not significantly LESS prevalent in Harmful taxa | number of pathways that were not differentially prevalent in Harmful taxa grouped in this MetaCyc Pathway Type / number of pathways that were not differentially prevalent in Harmful taxa | Over-representation p-value | Adjusted Over-representation p-value | Pathways Over-represented within this MetaCyc Pathway Type | Harmful Taxa Predicted to Lack the Over-represented Pathways |  |
| ALS LTB IgA V0 to V21    | Amino Acid Biosynthesis; Superpathways                                                                                           | 1/1 (100.0%)                                                                                                                                                                                   | 15/330 (4.5%)                                                                                                                                                                              | 0.048                       | 1.000                                | superpathway of L-methionine biosynthesis (transsulfuration) | Anaerostipes; Haemophilus; Phascolarctobacterium              | 0/0 (NaN%)                                                                                                                                                                                     | 16/331 (4.8%)                                                                                                                                                                              | 1.000                       | 1.000                                |                                                            |                                                              |  |
| Serum CFAI IgG V0 to V21 | Fatty Acid and Lipid Biosynthesis                                                                                                | 0/0 (NaN%)                                                                                                                                                                                     | 21/331 (6.3%)                                                                                                                                                                              | 1.000                       | 1.000                                |                                                              |                                                               | 2/2 (100.0%)                                                                                                                                                                                   | 19/329 (5.8%)                                                                                                                                                                              | 0.004                       | 0.223                                | CDP-diacylglycerol biosynthesis I; CDP-                    | Sutterella                                                   |  |

|                          |                                                  |              |               |       |       |                                                                                                                                                                                                 |                                                                                                               |              |               |       |       |                                                           |                                                                                                         |
|--------------------------|--------------------------------------------------|--------------|---------------|-------|-------|-------------------------------------------------------------------------------------------------------------------------------------------------------------------------------------------------|---------------------------------------------------------------------------------------------------------------|--------------|---------------|-------|-------|-----------------------------------------------------------|---------------------------------------------------------------------------------------------------------|
|                          |                                                  |              |               |       |       |                                                                                                                                                                                                 |                                                                                                               |              |               |       |       | diacylglycerol biosynthesis II                            |                                                                                                         |
| Serum CFAI IgG V0 to V31 | Amino Acid Biosynthesis; Superpathways           | 1/1 (100.0%) | 15/330 (4.5%) | 0.048 | 1.000 | superpathway of L-alanine biosynthesis                                                                                                                                                          | Raoultibacter; Sutterella                                                                                     | 0/2 (0.0%)   | 16/329 (4.9%) | 1.000 | 1.000 |                                                           |                                                                                                         |
| Serum CFAI IgG V0 to V31 | Fatty Acid and Lipid Biosynthesis; Superpathways | 0/1 (0.0%)   | 7/330 (2.1%)  | 1.000 | 1.000 |                                                                                                                                                                                                 |                                                                                                               | 1/2 (50.0%)  | 6/329 (1.8%)  | 0.042 | 1.000 | superpathway of phospholipid biosynthesis III (E. coli)   | Raoultibacter; Sutterella                                                                               |
| ALS CFAI IgA V0 to V28   | Cell Structure Biosynthesis; Superpathways       | 1/3 (33.3%)  | 4/328 (1.2%)  | 0.045 | 1.000 | peptidoglycan biosynthesis IV (Enterococcus faecium)                                                                                                                                            | Actinomyces; Collinsella; Libanicoccus; Olsenella; Streptococcus                                              | 0/0 (NaN%)   | 5/331 (1.5%)  | 1.000 | 1.000 |                                                           |                                                                                                         |
| ALS CFAI IgA V0 to V28   | Antibiotic Resistance                            | 1/3 (33.3%)  | 2/328 (0.6%)  | 0.027 | 1.000 | peptidoglycan biosynthesis IV (Enterococcus faecium)                                                                                                                                            | Actinomyces; Collinsella; Libanicoccus; Olsenella; Streptococcus                                              | 0/0 (NaN%)   | 3/331 (0.9%)  | 1.000 | 1.000 |                                                           |                                                                                                         |
| ALS CFAI IgA V0 to V28   | Nucleoside and Nucleotide Biosynthesis           | 3/8 (37.5%)  | 27/324 (8.3%) | 0.027 | 1.000 | pyrimidine deoxyribonucleotides de novo biosynthesis I; pyrimidine deoxyribonucleotides de novo biosynthesis II; superpathway of pyrimidine deoxyribonucleotides de novo biosynthesis (E. coli) | Actinomyces; Anaerovoracaceae_nodatum_group; Bilophila; Lachnospiraceae_ND3007_group; Libanicoccus; Olsenella | 0/1 (0.0%)   | 30/331 (9.1%) | 1.000 | 1.000 |                                                           |                                                                                                         |
| ALS CFAI IgA V0 to V28   | Amino Acid Biosynthesis; Superpathways           | 0/8 (0.0%)   | 16/324 (4.9%) | 1.000 | 1.000 |                                                                                                                                                                                                 |                                                                                                               | 1/1 (100.0%) | 15/331 (4.5%) | 0.048 | 1.000 | superpathway of L-aspartate and L-asparagine biosynthesis | Actinomyces; Bilophila; Collinsella; Libanicoccus; Olsenella; Parasutterella; Streptococcus; Sutterella |
